# Supplementary material for: Folic acid conjugated ferritins as photosensitizer carriers for photodynamic therapy
Source: Royal Society of Chemistry journal article supplement (doi:10.1039/c5nr01833a), 2015-01-01
Supplement: c5nr01833a1.pdf [file c5nr01833a1.pdf]

**Electronic Supplementary Information (ESI) for:**

## **Folic acid conjugated ferritins as photosensitizer carriers for photodynamic therapy**

**Zipeng Zhen<sup>a,b</sup>, Wei Tang<sup>a,b</sup>, Weizhong Zhang<sup>a,b</sup>, Jin Xie<sup>a,b,\*</sup>**

<sup>a</sup>, Department of Chemistry, University of Georgia, Athens, Georgia 30602, United States

<sup>b</sup>, Bio-Imaging Research Center, University of Georgia, Athens, Georgia 30602, United States

\* E-mail: jinxie@uga.edu

### **Materials and methods:**

#### **Cell culture**

4T1 (murine breast cancer) cell line was from ATCC, and grown in RPMI 1640 medium supplemented with 10% fetal bovine serum (FBS) and 100 U/mL penicillin and 1% streptomycin (MediaTech, USA). For cell culture, 4T1 cells were incubated at 37 °C in 5% CO<sub>2</sub>.

#### **Ferritin purification, folic acid coupling and ZnF<sub>16</sub>Pc loading**

The protocols for producing ferritins and loading ZnF<sub>16</sub>Pc onto them are similar to what were published by us previously.<sup>14</sup> The photosensitizer loading was achieved by adding ZnF<sub>16</sub>Pc in DMSO into a FRT/FA-FRT solution in 0.01 M PBS (pH 7.4). After that, the mixture was incubated at room temperature for 45 min. The raw products were subjected to purification by going through a NAP-5 column to remove the unloaded ZnF<sub>16</sub>Pc. The ZnF<sub>16</sub>Pc content was determined spectroscopically by comparing with a standard absorbance curve of ZnF<sub>16</sub>Pc. The FRT/FA-FRT concentration was determined by Bradford protein assay. The loading rate was computed and expressed in weight percent (wt%). Coupling folic acid to ferritins was conducted following a published protein conjugation protocol with minor changes.<sup>25</sup> Typically, 5 mg of folic acid, 50 mg of 1-ethyl-3-(3-dimethylaminopropyl) carbodiimide hydrochloride (EDAC), and 50 mg of N-hydroxysuccinimide (NHS) were dissolved in 50 mL of a bicarbonate buffer (50 mM NaHCO<sub>3</sub>, pH 6) at room temperature (25 °C). A 10 mL aqueous solution (0.5 mg/mL) was subsequently added, and the mixture gently agitated for 2 h at room temperature. The raw product was purified by dialysis (MWCO = 100k) against PBS (pH 7.4) at 4 °C. The PBS was replenished every 12 hours, for at least 4 times. The purified FA-FRTs were concentrated using a centrifugal filter unit (Millipore, 100k). Bradford protein assay was used to determine the concentration of FA-FRTs.

For IRDye800 labelling, ferritins or FA-FRTs were incubated with IRDye800-NHS for 30 min at room temperature and then purified through a NAP-5 column. A starting molar ratio of 2:1 between the dye and the protein nanocage was used. The coupling efficiency was assessed spectroscopically by comparing with a predetermined IRDye800

absorbance standard curve (780 nm). It was determined that the final conjugates have on average one IRDye800 per ferritin particle.

### **Animal models**

All the animal studies were performed following a protocol approved by the Institutional Animal Care and Use Committee (IACUC) of the University of Georgia. For bio-safety evaluation, a total of 18 normal BALB/c mice were used. The animals were randomly divided into 3 groups, with 6 mice per group. Ferritins were administered either intraperitoneally (i.p.) at 50 mg/kg or intravenously (i.v.) at 15 mg/kg to two groups of the animals. A third group was monitored for controls. The animals were observed daily and their body weights were monitored for two weeks. 4T1 tumour models were established by subcutaneous injection of  $\sim 10^6$  4T1 cancer cells to the hind limbs of 4-5 week BALB/c mic. The imaging or therapy studies were conducted 1 week after the inoculation when the tumours reached a size of  $\sim 100$  mm<sup>3</sup>.

### ***In vivo* tumour targeting**

For tumour targeting, IRDye800-labeled P@FA-FRTs (0.75 mg ZnF<sub>16</sub>Pc/kg) were i.v. injected to 4T1 tumour bearing animals (average tumour size  $\sim 77.78 \pm 11.84$  mm<sup>3</sup>, n = 5). Whole-body fluorescence images were acquired on a Maestro II imaging system (PerkinElmer) using an NIR emission filter (750 – 940 nm) up to 24 h post injection. The fluorescence images were unmixed by the vendor provided software. ROIs were circled around tumor areas, and the average optical intensities (in total scaled counts/cm<sup>2</sup>/s) were recorded and compared. After the 24 h imaging, the animals were euthanized. The tumours as well as major organs were harvested for histology studies.

### ***In vivo* therapy studies**

The therapy studies were also performed in 4T1 tumour models. For the treatment group, the animals were i.v. injected with P@FA-FRTs (1.5 mg ZnF<sub>16</sub>Pc/kg). The tumours were irradiated at 24 h by a 671 nm laser (300 mW/cm<sup>2</sup>, over a  $\sim 1$  cm diameter beam) for 15 min. The two control groups received (1) P@FA-FRTs without irradiation, and (2) PBS only. Tumour sizes were measured every other day by a calliper and computed following the formula: size (mm<sup>3</sup>) = length (mm)  $\times$  width (mm)<sup>2</sup>/2.

### **Immunofluorescence staining**

The cryogenic slides with 8  $\mu$ m thickness were fixed with cold acetone for 30 min and washed by running water for 5 min. Subsequently, phycoerythrin-labeled anti-CD31 antibody (ab25644) was incubated with the slides at 4 °C overnight. After gently rinsing with PBS, the slides were mounted. The images were acquired on an Olympus IX71 microscope.

### **Hematoxylin and eosin staining**

H&E staining was performed according to a protocol provided by the vendor (BBC Biochemical). Briefly, 6  $\mu$ m paraffin-embedded slides were prepared. After treated with 100% xylene for 3 times (3 min each time), the slides were hydrated with a gradient concentrations of alcohol (100, 95, and 70%), each for 3 min. The hematoxylin staining was then performed for 3 min, and the slides were washed with running water for 3 min. The eosin staining was performed for 1 min. The slides were washed, dehydrated, treated with xylene, and then mounted with Canada balsam. The images were acquired on a Nikon Eclipse 90i microscope.

### **Statistical methods**

Quantitative data were expressed as mean  $\pm$  s.e.m. A two-tailed Student's t-test was used for statistically comparing the treatment group and the control group.  $P < 0.05$  was considered statistically significant.

## Supplementary data:

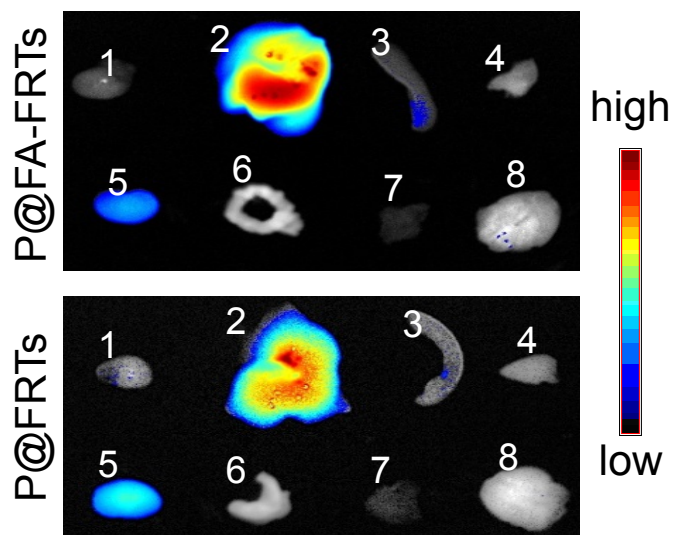

**Figure S1.** *Ex vivo* imaging results of 4T1 tumour-bearing BALB/c mice administrated with IRDye800-labeled P@FA-FRTs and FRTs. The organs were arranged in the following order: 1, Heart; 2, Liver; 3, Spleen; 4, Skin; 5, Kidney; 6, Intestine; 7, Muscle; 8, Brain.

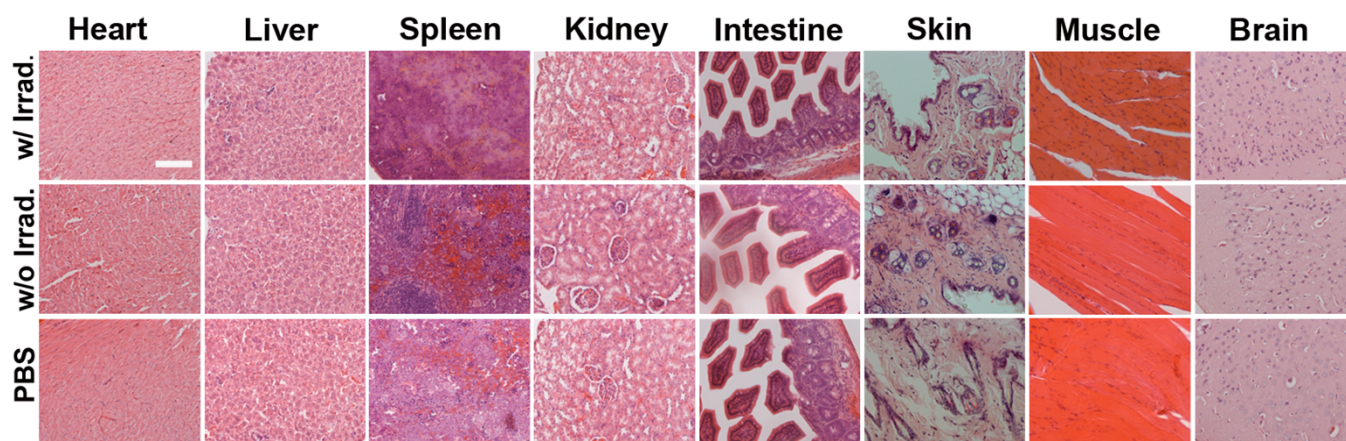

**Figure S2.** H&E staining results from other main organs. No obvious pathological abnormalities were found in these organs from all groups. Scale bar, 100  $\mu$ m.
